# Supplementary material for: Medial septum activation produces opposite effects on dopamine neuron activity in the ventral tegmental area and substantia nigra in MAM vs. normal rats
Source: PubMed Central journal article supplement (PMC6120917; doi:10.1038/s41537-018-0059-3), 2018-09-03
Supplement: 41537_2018_59_MOESM1_ESM.pdf [file 41537_2018_59_MOESM1_ESM.pdf]

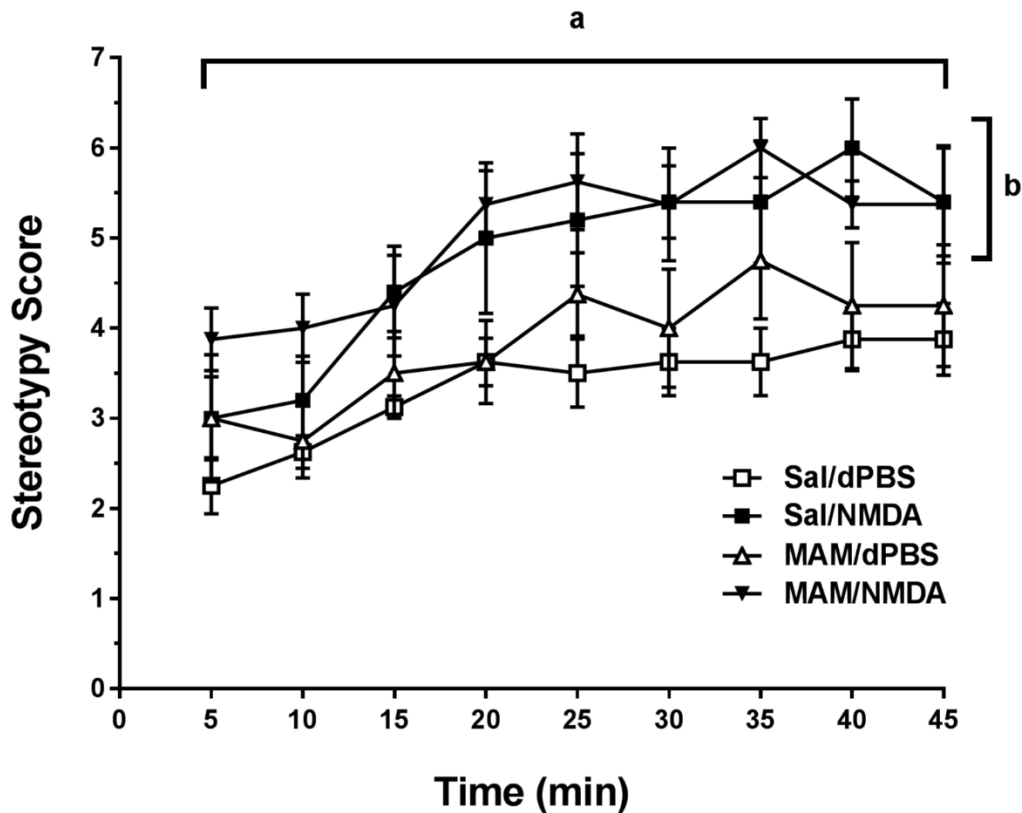

**Supplementary Figure 1: MS activation does not increase stereotyped behavior in MAM versus Sal-treated rats.** Amphetamine injection (2 mg/kg) following MS activation (NMDA, 0.75  $\mu$ g in 0.2  $\mu$ L or dPBS) results in a significant increase in stereotypy over time ( $a = F_{8, 200} = 16.74, P < 0.0001$ ) that is greater in NMDA-treated versus dPBS-treated rats ( $b = F_{3, 25} = 4.967, P = 0.0077$ ). However, this does not interact with MAM treatment ( $F_{24, 200} = 0.6961, P = 0.85$ ), as MAM/NMDA rats do not differ from Sal/NMDA rats at any time point (all  $P$ 's  $> 0.05$ ).

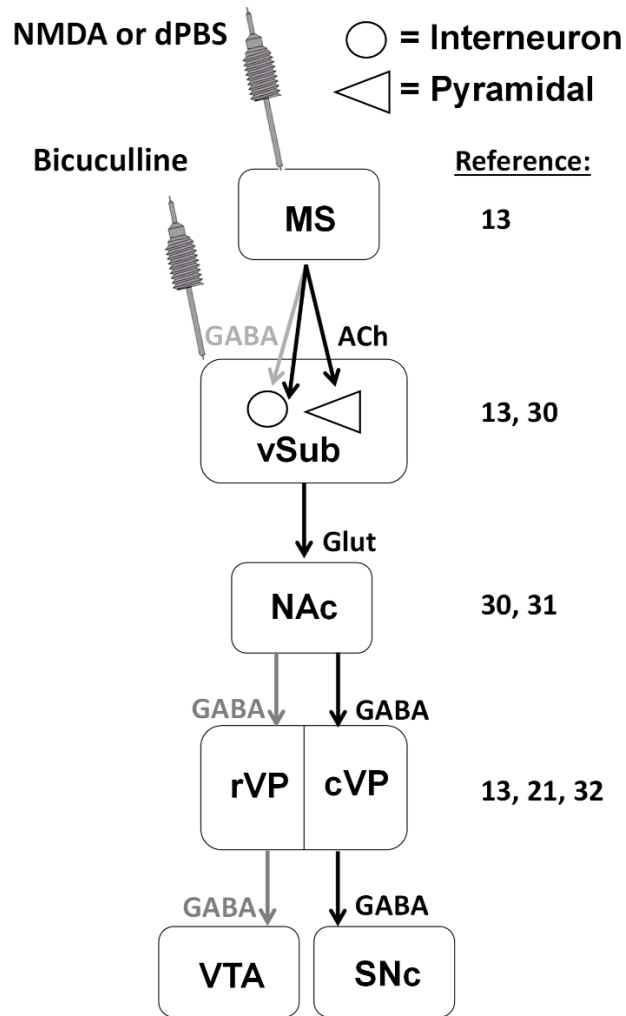

**Supplementary Figure 2: Proposed multi-synaptic pathway from MS to midbrain and supporting references.** The medial septum (MS) contacts the ventral subiculum (vSub)<sup>38</sup> through projections that are predominately cholinergic and GABAergic.<sup>15</sup> GABAergic projections largely target GABAergic interneurons<sup>25</sup>, whereas the cholinergic projections target both pyramidal neurons and interneurons<sup>42</sup>, leading to activation of the vSub.<sup>13</sup> The vSub activates the nucleus accumbens (NAc)<sup>30,34</sup>, which inhibits the ventral pallidum (VP).<sup>21,32</sup> VP regulation of midbrain DA neuron activity is functionally split along the rostral/caudal axis (rVP, cVP), with the rVP selectively modulating population activity changes in the VTA and the cVP selectively modulating changes in the SNc.<sup>13</sup> Sites of pharmacological manipulation and what was infused are indicated.
